# Supplementary material for: Ligand-Based Drug Design of Novel Antimicrobials against Staphylococcus aureus by Targeting Bacterial Transcription
Source: MDPI journal article supplement (doi:10.3390/ijms24010339), 2022-12-25
Supplement: s1 [file s1]

# Ligand-Based Drug Design of Novel Antimicrobials against *Staphylococcus aureus* by Targeting Bacterial Transcription

Jiqing Ye <sup>1,2</sup>, Xiao Yang <sup>3,\*</sup> and Cong Ma <sup>1,\*</sup>

<sup>1</sup> State Key Laboratory of Chemical Biology and Drug Discovery, Department of Applied Biology and Chemical Technology, The Hong Kong Polytechnic University, Kowloon, Hong Kong SAR, China

<sup>2</sup> School of Pharmacy, Inflammation and Immune Mediated Diseases Laboratory of Anhui Province, Anhui Medical University, Hefei 230032, China

<sup>3</sup> Department of Microbiology, Prince of Wales Hospital, The Chinese University of Hong Kong, Shatin, Hong Kong SAR, China

\* Correspondence: xiaoyang@cuhk.edu.hk (X.Y.); cong.ma@polyu.edu.hk (C.M.)

**Table S1.** Chemical structures for molecular modeling

| Cpd.            | SMILES                                                                 |
|-----------------|------------------------------------------------------------------------|
| 1               | <chem>[O-][N+](=O)c(c1)ccc(O)c1/C=N/c2c(F)cccc2</chem>                 |
| 2 <sup>a</sup>  | <chem>[O-][N+](=O)c(c1)ccc(O)c1/C=N/c2cc(F)ccc2</chem>                 |
| 3               | <chem>[O-][N+](=O)c(c1)ccc(O)c1/C=N/c2ccc(F)cc2</chem>                 |
| 4               | <chem>c1cccc(c1C)\N=C\c2c(O)ccc(c2)[N+](O)=O</chem>                    |
| 5               | <chem>Cc1cc(ccc1)\N=C\c2c(O)ccc(c2)[N+](O)=O</chem>                    |
| 6 <sup>a</sup>  | <chem>Cc1ccc(cc1)\N=C\c2c(O)ccc(c2)[N+](O)=O</chem>                    |
| 7               | <chem>CC(C)(C)c1cc(ccc1)\N=C\c2c(O)ccc(c2)[N+](O)=O</chem>             |
| 8               | <chem>[O-][N+](=O)c(c1)ccc(O)c1/C=N/c2c(OC)cccc2</chem>                |
| 9               | <chem>[O-][N+](=O)c(c1)ccc(O)c1/C=N/c2cc(OC)ccc2</chem>                |
| 10              | <chem>[O-][N+](=O)c(c1)ccc(O)c1/C=N/c2ccc(cc2)OC</chem>                |
| 11 <sup>a</sup> | <chem>COC(=O)c1c(ccc1)\N=C\c2c(O)ccc(c2)[N+](O)=O</chem>               |
| 12              | <chem>COC(=O)c1cc(ccc1)\N=C\c2c(O)ccc(c2)[N+](O)=O</chem>              |
| 13              | <chem>COC(=O)c1ccc(cc1)\N=C\c2c(O)ccc(c2)[N+](O)=O</chem>              |
| 14 <sup>a</sup> | <chem>C#Cc1cc(ccc1)\N=C\c2c(O)ccc(c2)[N+](O)=O</chem>                  |
| 15              | <chem>OCc1cc(ccc1)\N=C\c2c(O)ccc(c2)[N+](O)=O</chem>                   |
| 16 <sup>a</sup> | <chem>OCc1ccc(cc1)\N=C\c2c(O)ccc(c2)[N+](O)=O</chem>                   |
| 17 <sup>a</sup> | <chem>NC(=O)c1cc(ccc1)\N=C\c2c(O)ccc(c2)[N+](O)=O</chem>               |
| 18 <sup>a</sup> | <chem>[O-][N+](=O)c(c1)ccc(O)c1/C=N/c2cc(S(=O)(=O)N)ccc2</chem>        |
| 19              | <chem>c1cccc(c1C#N)\N=C\c2c(O)ccc(c2)[N+](O)=O</chem>                  |
| 20              | <chem>N#Cc1cc(ccc1)\N=C\c2c(O)ccc(c2)[N+](O)=O</chem>                  |
| 21              | <chem>N#Cc1ccc(cc1)\N=C\c2c(O)ccc(c2)[N+](O)=O</chem>                  |
| 22              | <chem>N#CCc1cc(ccc1)\N=C\c2c(O)ccc(c2)[N+](O)=O</chem>                 |
| 23              | <chem>O=C(O)Cc1cc(ccc1)\N=C\c2c(O)ccc(c2)[N+](O)=O</chem>              |
| 24              | <chem>[O-][N+](=O)c(c1)ccc(O)c1/C=N/c(ccc2)cc2CNS(=O)(=O)C</chem>      |
| 25              | <chem>FC(F)(F)[C@H](O)c1cc(ccc1)\N=C\c2c(O)ccc(c2)[N+](O)=O</chem>     |
| 26              | <chem>CONC(=O)c1cc(ccc1)\N=C\c2c(O)ccc(c2)[N+](O)=O</chem>             |
| 27 <sup>a</sup> | <chem>CS(=O)(=O)NC(=O)c1cc(ccc1)\N=C\c2c(O)ccc(c2)[N+](O)=O</chem>     |
| 28              | <chem>CN(C)S(=O)(=O)NC(=O)c1cc(ccc1)\N=C\c2c(O)ccc(c2)[N+](O)=O</chem> |
| 29 <sup>a</sup> | <chem>[O-][N+](=O)c(c1)ccc(O)c1/C=N/c(cccc2)c2-c3ccccc3</chem>         |
| 30              | <chem>[O-][N+](=O)c(c1)ccc(O)c1/C=N/c(ccc2)cc2-c3ccccc3</chem>         |
| 32              | <chem>[O-][N+](=O)c(c1)ccc(O)c1/C=N/c(cc2)ccc2-c3ccccc3</chem>         |
| 33              | <chem>C#Cc1cc(ccc1)\N=C\c2c(O)ccc(c2)[N+](O)=O</chem>                  |
| 34 <sup>a</sup> | <chem>c1cccc(c1C#C)\N=C\c2c(O)ccc(c2)[N+](O)=O</chem>                  |
| 35 <sup>a</sup> | <chem>C#Cc1ccc(cc1)\N=C\c2c(O)ccc(c2)[N+](O)=O</chem>                  |
| 36              | <chem>[O-][N+](=O)c(c1)ccc(O)c1/C=N/c2ccccc2</chem>                    |
| 37              | <chem>c1cccc(c1C(C)(C)C)\N=C\c2c(O)ccc(c2)[N+](O)=O</chem>             |
| 38              | <chem>CC(C)(C)c1cc(ccc1)\N=C\c2c(O)ccc(c2)[N+](O)=O</chem>             |
| 39              | <chem>CC(C)(C)c1ccc(cc1)\N=C\c2c(O)ccc(c2)[N+](O)=O</chem>             |
| 40              | <chem>[O-][N+](=O)c(c1)ccc(O)c1/C=N/c2c(O)cccc2</chem>                 |
| 41              | <chem>[O-][N+](=O)c(c1)ccc(O)c1/C=N/c2cc(O)ccc2</chem>                 |
| 42 <sup>a</sup> | <chem>[O-][N+](=O)c(c1)ccc(O)c1/C=N/c2ccc(O)cc2</chem>                 |
| 43              | <chem>[O-][N+](=O)c(c1)ccc(O)c1/C=N/c2c(Cl)cccc2</chem>                |
| 44              | <chem>[O-][N+](=O)c(c1)ccc(O)c1/C=N/c2cc(Cl)ccc2</chem>                |
| 45              | <chem>[O-][N+](=O)c(c1)ccc(O)c1/C=N/c2ccc(Cl)cc2</chem>                |
| 46 <sup>a</sup> | <chem>c1cccc(c1C(F)(F)F)\N=C\c2c(O)ccc(c2)[N+](O)=O</chem>             |
| 47              | <chem>FC(F)(F)c1cc(ccc1)\N=C\c2c(O)ccc(c2)[N+](O)=O</chem>             |
| 48              | <chem>FC(F)(F)c1ccc(cc1)\N=C\c2c(O)ccc(c2)[N+](O)=O</chem>             |
| 49              | <chem>O=C(O)c1cc(ccc1)\N=C\c2c(O)ccc(c2)[N+](O)=O</chem>               |
| 50 <sup>a</sup> | <chem>[O-][N+](=O)c(c1)ccc(O)c1/C=N/C2CCCCC2</chem>                    |
| 51              | <chem>[O-][N+](=O)c(c1)ccc(O)c1/C=N/c2cccc(c23)cccc3</chem>            |
| 52              | <chem>C#Cc1cc(ccc1)\N=C\c2c(O)ccc(c2)cc2C(=O)OC</chem>                 |

|                       |                                                               |
|-----------------------|---------------------------------------------------------------|
| <b>53<sup>a</sup></b> | <chem>C#Cc1cc(ccc1)\N=C\c2c(O)ccc(F)c2</chem>                 |
| <b>54</b>             | <chem>C#Cc1cc(ccc1)\N=C\c(c(O)cc2)cc2C#N</chem>               |
| <b>55<sup>a</sup></b> | <chem>C#Cc1cc(ccc1)\N=C\c2c(O)ccc(c2)CC#N</chem>              |
| <b>56</b>             | <chem>C#Cc1cc(ccc1)\N=C\c2c(O)cccc2</chem>                    |
| <b>57</b>             | <chem>C#Cc1cc(ccc1)\N=C\c2cc([N+])([O-])=O)ccc2</chem>        |
| <b>58<sup>a</sup></b> | <chem>C#Cc1cc(ccc1)\N=C\c2c(O)cc([N+])([O-])=O)cc2</chem>     |
| <b>59</b>             | <chem>C#Cc1cc(ccc1)\N=C\c2c(O)c([N+])([O-])=O)ccc2</chem>     |
| <b>60<sup>a</sup></b> | <chem>C#Cc1cc(ccc1)\N=C\c2c([N+])([O-])=O)ccc(c2)O</chem>     |
| <b>61</b>             | <chem>C#Cc1cc(ccc1)\N=C\c2c(O)c(Br)cc(c2)[N+])([O-])=O</chem> |

<sup>a</sup> Compounds taken for the test set

**Table S2. Physicochemical Properties of the identified hits**

| ID#                             | J098-0498                                                       | 1067-0401                                                         | M013-0558                                                     | F186-0261                                                         |
|---------------------------------|-----------------------------------------------------------------|-------------------------------------------------------------------|---------------------------------------------------------------|-------------------------------------------------------------------|
| <b>Formula</b>                  | C <sub>24</sub> H <sub>25</sub> N <sub>3</sub> O <sub>6</sub> S | C <sub>19</sub> H <sub>16</sub> BrN <sub>5</sub> O <sub>3</sub> S | C <sub>26</sub> H <sub>25</sub> N <sub>3</sub> O <sub>4</sub> | C <sub>20</sub> H <sub>18</sub> ClN <sub>3</sub> O <sub>4</sub> S |
| <b>Molecular weight</b>         | 483.54 g/mol                                                    | 474.33 g/mol                                                      | 443.49 g/mol                                                  | 431.89 g/mol                                                      |
| <b>Num. heavy atoms</b>         | 34                                                              | 29                                                                | 33                                                            | 29                                                                |
| <b>Num. arom. heavy atoms</b>   | 17                                                              | 17                                                                | 18                                                            | 17                                                                |
| <b>Fraction Csp<sup>3</sup></b> | 0.25                                                            | 0.11                                                              | 0.19                                                          | 0.15                                                              |
| <b>Num. rotatable bonds</b>     | 8                                                               | 8                                                                 | 7                                                             | 9                                                                 |
| <b>Num. H-bond acceptors</b>    | 6                                                               | 6                                                                 | 4                                                             | 5                                                                 |
| <b>Num. H-bond donors</b>       | 2                                                               | 3                                                                 | 2                                                             | 2                                                                 |
| <b>Molar Refractivity</b>       | 130.28                                                          | 114.57                                                            | 129.98                                                        | 113.12                                                            |
| <b>TPSA</b>                     | 126.33 Å <sup>2</sup>                                           | 144.81 Å <sup>2</sup>                                             | 87.74 Å <sup>2</sup>                                          | 117.79 Å <sup>2</sup>                                             |
